# Supplementary material for: How Does Public Service Motivation Affect the Proactive Service Behaviors of Grid Workers? A Study of Survey Evidence from Eastern China
Source: MDPI journal article supplement (doi:10.3390/bs14030148), 2024-02-20
Supplement: s1 [file s1]

---

## Supplementary Materials

**Table S1.** Correlation coefficients between the main variables.

| Variable                          | 1.      | 2.      | 3.      | 4.      | 5.      |
|-----------------------------------|---------|---------|---------|---------|---------|
| 1. PSM                            | (0.778) |         |         |         |         |
| 2. Organizational Support         | 0.491** | (0.811) |         |         |         |
| 3. Organizational service climate | 0.508** | 0.577** | (0.876) |         |         |
| 4. Occupational Identity          | 0.521** | 0.537** | 0.604** | (0.823) |         |
| 5. Proactive service behavior     | 0.222** | 0.703** | 0.604** | 0.380** | (0.835) |

Notes: Sample size is 348. \*\* p <0.01. The square roots of the variable AVE are presented in brackets in the diagonal cells.
